# Supplementary material for: Clast imbrication in coarse-grained mountain streams and stratigraphic archives as indicator of deposition in upper flow regime conditions
Source: Copernicus journal article supplement (doi:10.5194/esurf-6-743-2018), 2018-09-04
Supplement: Supplementary file 1 [file esurf-6-743-2018-supplement.zip]

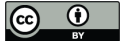

## *Supplement of*

# **Clast imbrication in coarse-grained mountain streams and stratigraphic archives as indicator of deposition in upper flow regime conditions**

**Fritz Schlunegger and Philippos Garefalakis**

*Correspondence to:* Fritz Schlunegger ([fritz.schlunegger@geo.unibe.ch](mailto:fritz.schlunegger@geo.unibe.ch)) and  
Philippos Garefalakis ([philippos.garefalakis@geo.unibe.ch](mailto:philippos.garefalakis@geo.unibe.ch))

- [esurf-6-743-2018-supplement-title-page.pdf](#)
- [StandingWave\\_KleineEmme\\_16022018\\_KOMPRIMIERT.mp4](#)

The copyright of individual parts of the supplement might differ from the CC BY 4.0 License.
